# Supplementary material for: Gene Transfer of Engineered Calmodulin Alleviates Ventricular Arrhythmias in a Calsequestrin‐Associated Mouse Model of Catecholaminergic Polymorphic Ventricular Tachycardia
Source: PubMed Central journal article supplement — J Am Heart Assoc. 2018 May 2;7(10):e008155. doi: 10.1161/JAHA.117.008155 (PMC6015318; doi:10.1161/jaha.117.008155), 2018-05-02
Supplement: JAH3-7-e008155-s001.pdf [file JAH3-7-e008155-s001.pdf]

# **SUPPLEMENTAL MATERIAL**

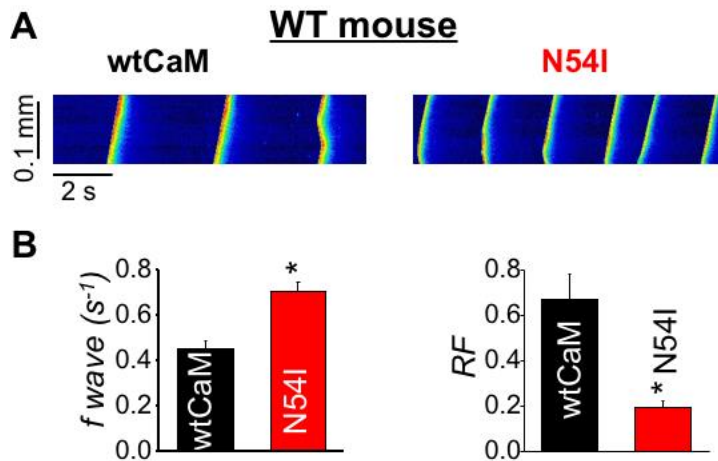

**Figure S1. CPVT CaM N54I increased Ca waves frequency and shortened RyR2 refractoriness. A)** representative line-scan images of SCWs in permeabilized WT myocytes exposed to cAMP. **B)** Average frequency of SCWs (n=46-51 cells) and refractoriness (n=21-22 cells), \* p<0.05 vs wtCaM. CPVT, Catecholaminergic polymorphic ventricular tachycardia; CaM, Calmodulin; Ca, Calcium; RyR2, Ryanodine receptor 2; cAMP, Cyclic adenosine monophosphate; SCW, spontaneous Ca waves; WT, wild type.

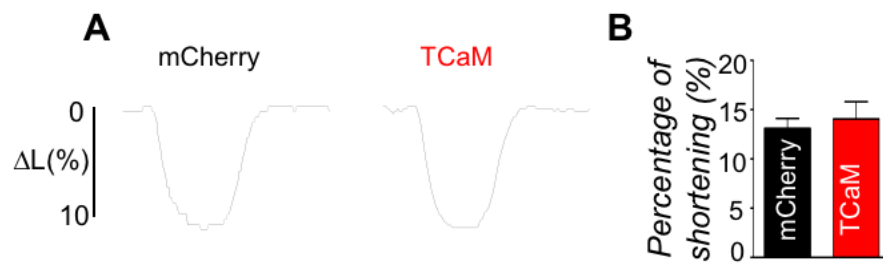

**Figure S2. TCaM did not alter the extent of myocyte shortening in R33Q myocytes.** **A)** representative shortening traces of R33Q myocytes infected with control (mCherry) or TCaM virus. **B)** Average percentage of shortening (n=45-47 cells), \* p<0.05 vs mCherry. TCaM, Therapeutic Calmodulin.

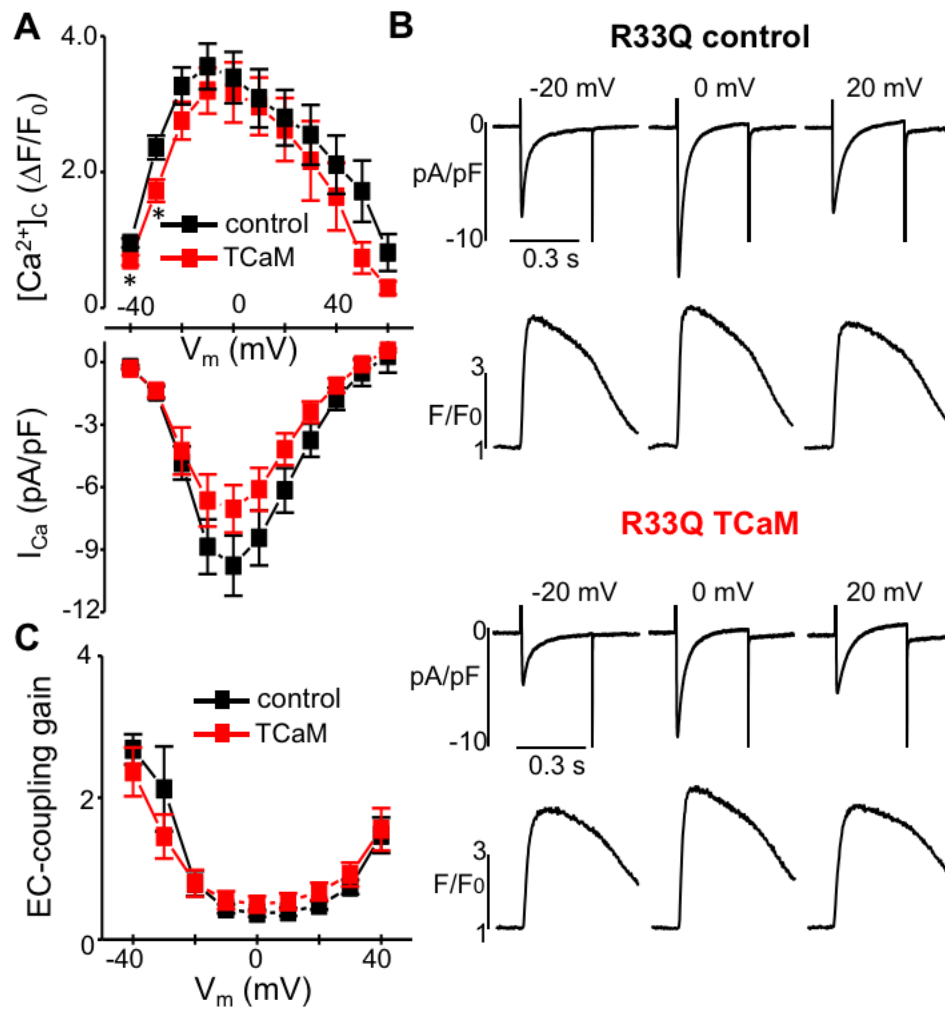

**Figure S3. EC-coupling in R33Q myocytes noninfected (control) and infected with TCaM.** **A**) Voltage-dependence of  $Ca$  currents ( $I_{Ca}$ ) and corresponding  $Ca$  transients recorded in control R33Q myocytes ( $n=6$ ) and in R33Q myocyte expressing TCaM ( $n=4$ ). **B**) Representative traces of  $Ca$  transients and  $I_{Ca}$  evoked by depolarizing steps from -50 to -20, 0, and 20 mV in control and TCaM myocytes, respectively. **C**) The EC-coupling gain in R33Q control and TCaM myocytes. \*,  $P<0.05$  vs control. EC, excitation contraction; TCaM, Therapeutic Calmodulin; Ca, Calcium;  $I_{Ca}$ , Calcium current.
